# Supplementary material for: Fluorescent crystals and co-crystals of 1,8-naphthalimide derivatives: synthesis, structure determination and photophysical characterization
Source: Royal Society of Chemistry journal article supplement (doi:10.1039/c5tc01518a), 2015-01-01
Supplement: c5tc01518a1.pdf [file c5tc01518a1.pdf]

## Supporting Information

### **Fluorescent crystals and co-crystals of 1,8-naphthalimide derivatives: synthesis, structure determination and photophysical characterization**

*Fabrizia Grepioni,<sup>a,\*</sup> Simone d'Agostino,<sup>a,\*</sup> Dario Braga,<sup>a</sup> Alessio Bertocco,<sup>a</sup> Luca Catalano,<sup>a</sup>*

*Barbara Ventura<sup>b,\*</sup>*

(a) Dipartimento di Chimica "G. Ciamician", Università di Bologna, Via F. Selmi 2, 40126  
Bologna, Italy.

(b) Istituto per la Sintesi Organica e la Fotoreattività (ISOF) – CNR, Via P. Gobetti 101, 40129  
Bologna, Italy.

## Table of Contents

|                                                                                                                        |         |
|------------------------------------------------------------------------------------------------------------------------|---------|
| Crystallographic data for crystalline <b>4 Form I</b>                                                                  | Page 3  |
| Superimposition of <b>Form I</b> and <b>Form II</b> molecular structures for crystalline <b>4</b>                      | Page 3  |
| Types of dimers observed in crystalline <b>2-4</b>                                                                     | Page 4  |
| Types of dimers observed in co-crystals <b>n<sub>2</sub>·I2F4</b>                                                      | Page 4  |
| XRPD for crystalline <b>2-4</b> and co-crystals <b>n<sub>2</sub>·I2F4</b>                                              | Page 5  |
| ATR-FTIR spectra of components I2F4, <b>3</b> and product <b>3<sub>2</sub>·I2F4</b>                                    | Page 6  |
| ATR-FTIR spectra of components I2F4, <b>4</b> and product <b>4<sub>2</sub>·I2F4</b>                                    | Page 6  |
| TGA thermograms for the compounds <b>2, 3 (Form I and Form II), and 4 (Form II)</b>                                    | Page 7  |
| Traces for the compounds: (a) <b>2</b> , (b1) <b>3 (Form I)</b> , (b2) <b>3 (Form II)</b> , and (c) <b>4 (Form II)</b> | Page 8  |
| VT-XRPD patterns for crystalline <b>3 (Form II)</b>                                                                    | Page 9  |
| TGA thermograms for the co-crystals <b>n<sub>2</sub>·I2F4</b>                                                          | Page 9  |
| Absorption and emission spectra of <b>3</b> and <b>4</b> in solution                                                   | Page 10 |
| Luminescence data in toluene glassy matrix at 77 K                                                                     | Page 11 |
| Fluorescence spectra of <b>2, 3</b> and <b>4</b> in toluene at 77K                                                     | Page 11 |
| Structural detail for crystalline <b>4<sub>2</sub>·I2F4</b>                                                            | Page 12 |

**Table S1.** Crystallographic data and details of measurements for crystalline **4 Form I**.

|                     | <b>4</b>                                                      |                                                           |        |
|---------------------|---------------------------------------------------------------|-----------------------------------------------------------|--------|
| Formula             | C <sub>23</sub> H <sub>21</sub> N <sub>3</sub> O <sub>2</sub> | D <sub>calc</sub> (g/cm <sup>3</sup> )                    | 1.349  |
| fw                  | 371.43                                                        | packing coefficient (%) <sup>a</sup>                      | 69.9   |
| Cryst. System       | Orthorhombic                                                  | accessible void (Å <sup>3</sup> ) <sup>a</sup>            | 0      |
| Space group         | Pna2 <sub>1</sub>                                             | μ (mm <sup>-1</sup> )                                     | 0.088  |
| Z                   | 4                                                             | Measd reflns                                              | 7735   |
| a (Å)               | 30.652(5)                                                     | Indep reflns                                              | 3143   |
| b (Å)               | 5.3082(9)                                                     | R <sub>1</sub> [on F <sub>o</sub> <sup>2</sup> , I>2σ(I)] | 0.0663 |
| c (Å)               | 11.243(2)                                                     | wR <sub>2</sub> (all data)                                | 0.1116 |
| α (deg)             | 90                                                            |                                                           |        |
| β (deg)             | 90                                                            |                                                           |        |
| γ (deg)             | 90                                                            |                                                           |        |
| V (Å <sup>3</sup> ) | 1829.3(6)                                                     |                                                           |        |

<sup>a</sup>Calculated with Platon; for the accessible void calculation a probe of 1.2 Å<sup>3</sup> was employed.

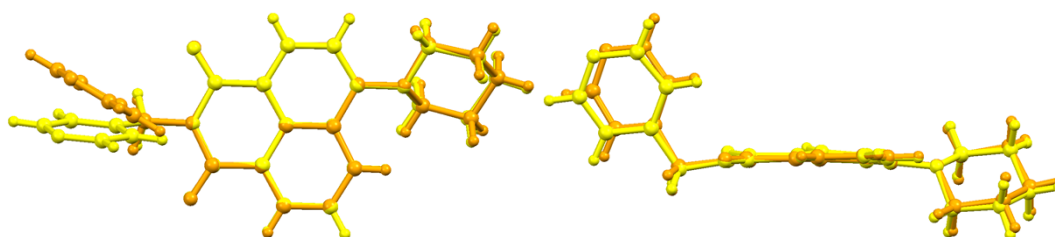

**Figure S1.** Top (left) and side (right) views for the superimposition of **4 (Form I)** (orange) and **4 (Form II)** (yellow) molecular structures for crystalline **4**, showing that the two conformations are almost exactly the same in the two polymorphs. H<sub>CH</sub> are omitted for clarity.

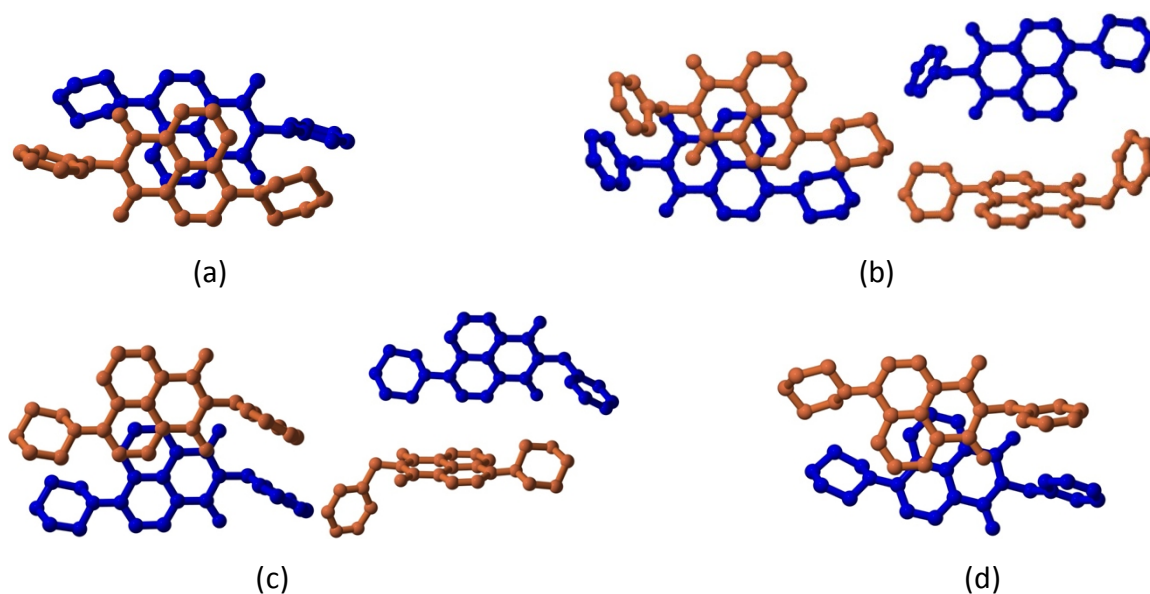

**Figure S2.** Types of dimers observed in crystalline **2-4**: (a) head-to-tail dimer in crystalline **2**, CD = 3.8Å, ID = 3.4Å, offset = 1.7 Å; (b) head-to-head dimer in crystalline **3**: CD = 5.3 Å, ID = 3.5 Å, offset 3.9 Å (left), and T-dimers with dC–H···π = 3.2 Å or dC···π = 4.0 Å (right); (c) head-to-head dimer in crystalline **4 (Form I)**: CD = 5.3 Å, ID = 3.5 Å, offset 3.9 Å (left), and T-dimers dC–H···π = 2.7–2.9 Å or dC···π = 3.6 Å (right), and (d) head-to-head dimer in crystalline **4 (Form II)**: CD = 4.6 Å, ID = 3.3 Å, offset 3.2 Å. H<sub>CH</sub> omitted for clarity.

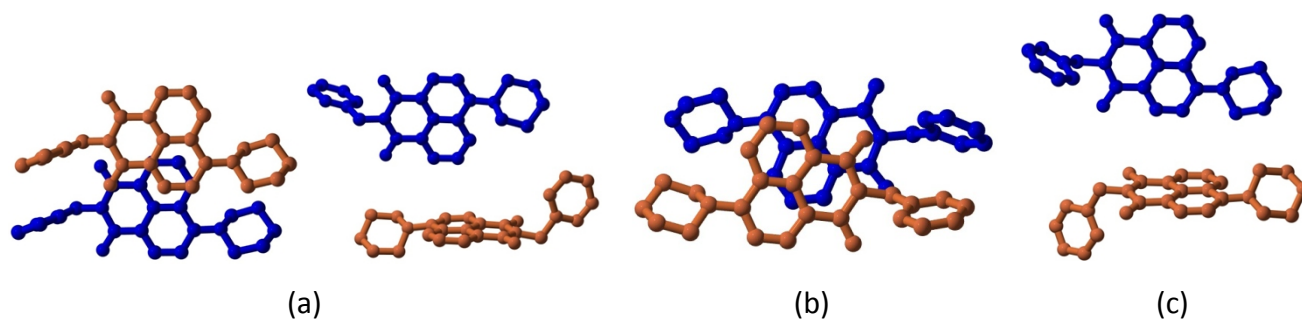

**Figure S3.** Types of dimers observed in **n<sub>2</sub>·12F4** co-crystals. (a) head-to-head dimer in crystalline **2<sub>2</sub>·12F4**, CD = 5.2 Å, ID = 3.3 Å, offset = 4.0Å (left), and T-dimer dC–H···π = 2.8–3.1 Å or dC···π = 3.7–3.8 Å (right); (b) head-to-head dimer in crystalline **3<sub>2</sub>·12F4**, CD = 4.1 Å, ID = 3.5 Å, offset = 2.1Å; (c) T-dimer in crystalline **4<sub>2</sub>·12F4**, dC–H···π = 2.8-3.0 Å or dC···π = 3.7-3.9 Å. H<sub>CH</sub> omitted for clarity.

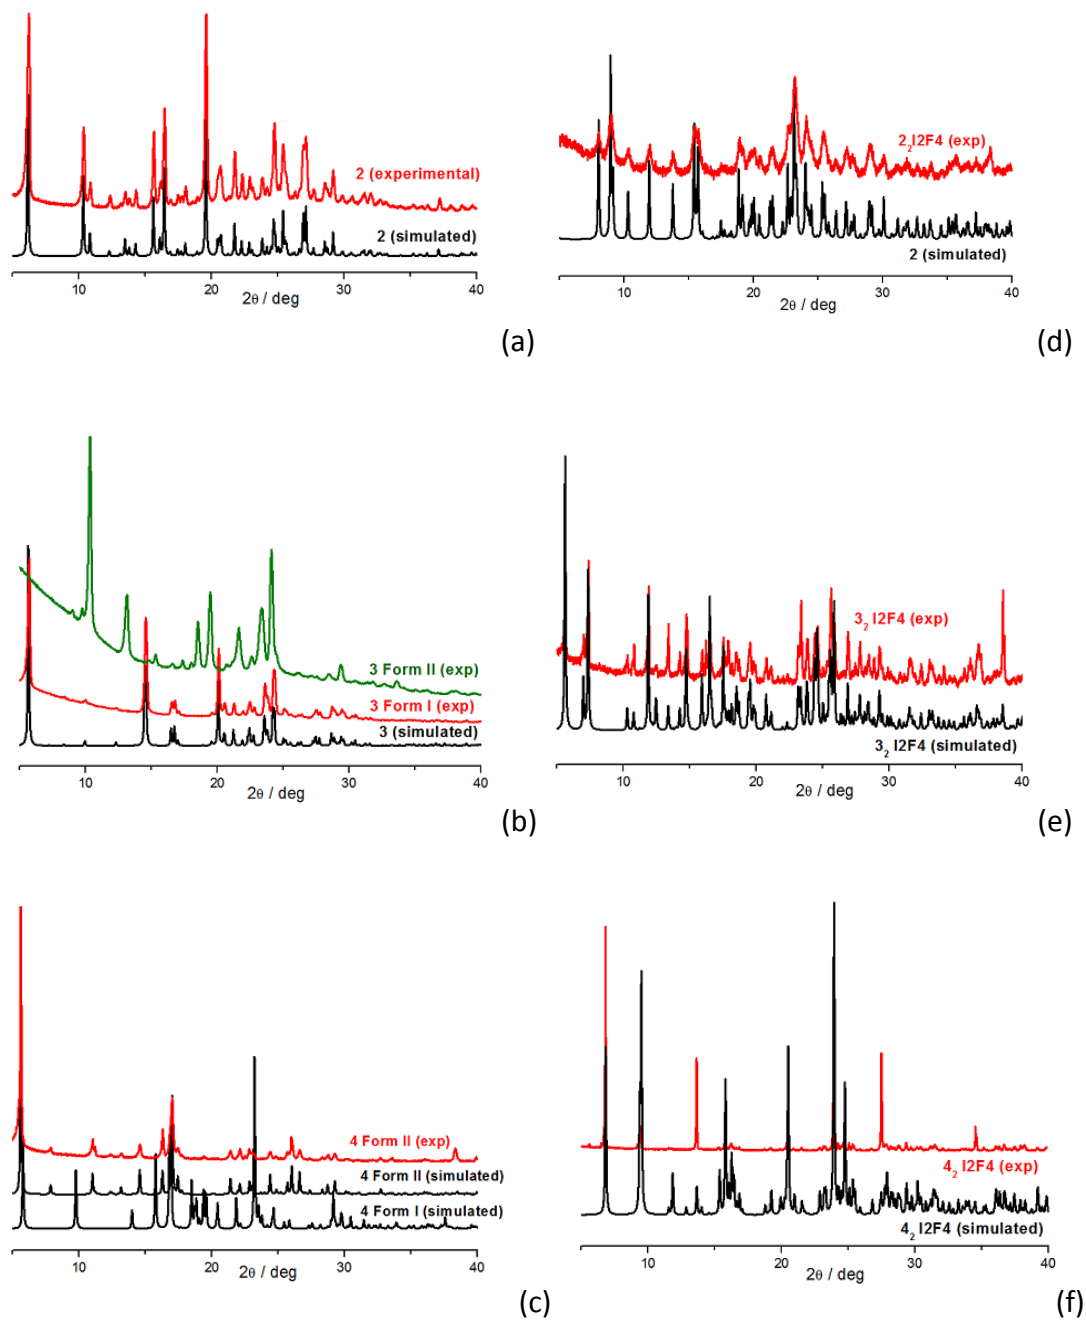

**Figure S4.** Experimental (red-line) and simulated (black-line) X-ray powder diffraction patterns for compounds: (a) **2**, (b) **3**, and (c) **4** of for corresponding co-crystals: (d) **2<sub>2</sub>·12F4**, (e) **3<sub>2</sub>·12F4**, and (f) **4<sub>2</sub>·12F4**.

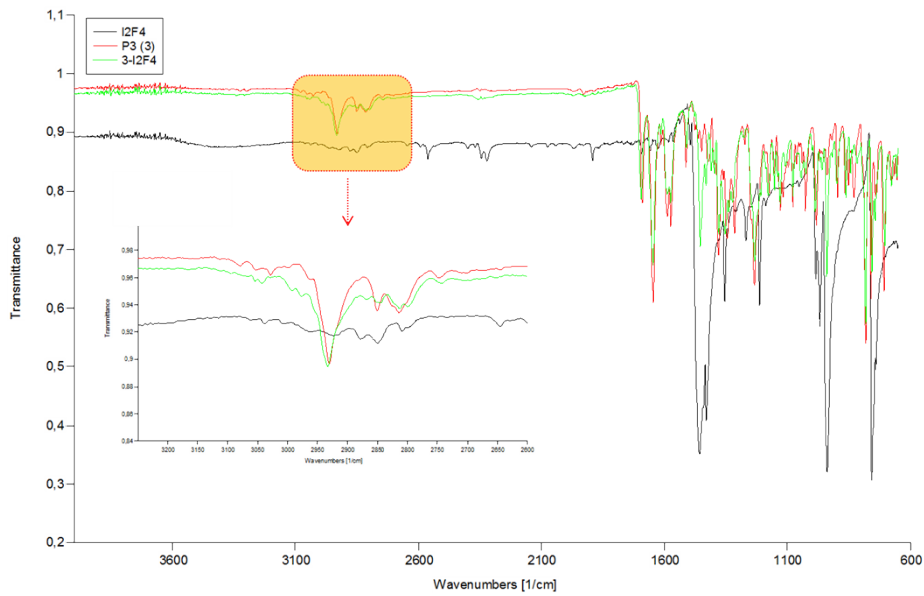

**Figure S5.** ATR-FTIR spectra of components I2F4 (black line), **3** (red line) and **3**<sub>2</sub>·I2F4 (green line) in the range 4000-600 cm<sup>-1</sup>. The inset highlights the shifts to higher frequencies for the ν<sub>C<sub>pyr</sub>-H</sub> stretching (from **3**) of the pyridine involved in the halogen bond.

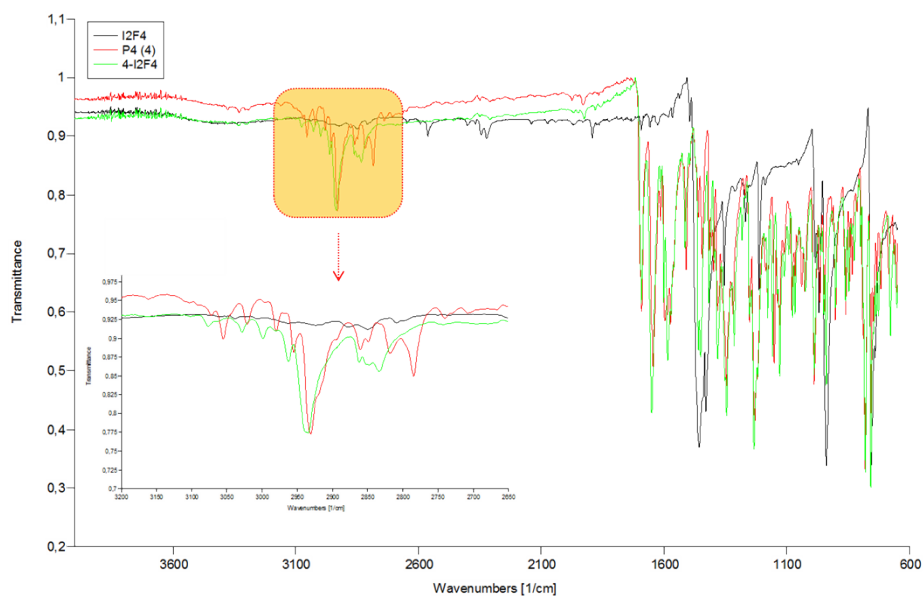

**Figure S6.** ATR-FTIR spectra of components I2F4 (black line), **4** (red line) and **4**<sub>2</sub>·I2F4 (green line) in the range 4000-600 cm<sup>-1</sup>. The inset highlights the shifts to higher frequencies for the ν<sub>C<sub>pyr</sub>-H</sub> stretching (from **4**) of the pyridine involved in the halogen bond.

## Thermal characterization (TGA-DSC-VTPXRD).

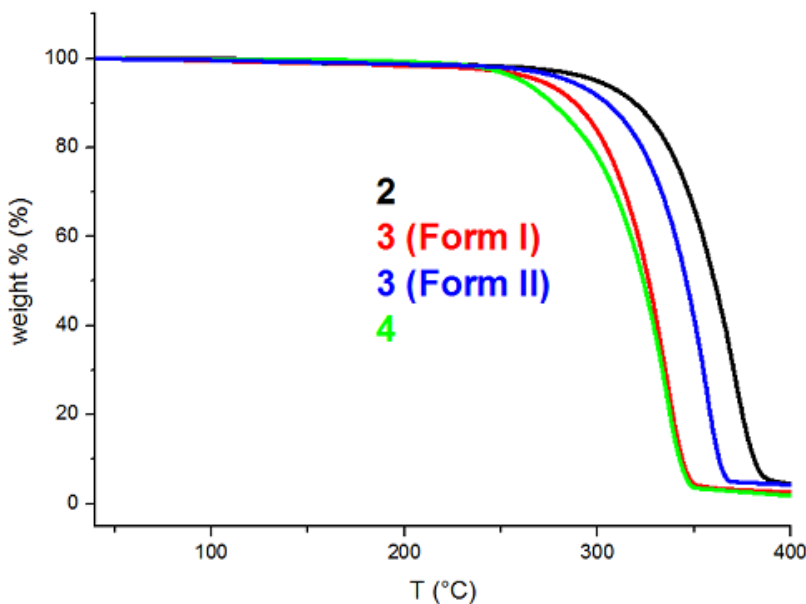

**Figure S7.** TGA thermograms for the compounds **2**, **3 (Form I and Form II)**, and **4 (Form II)**.

Differential scanning calorimetry (DSC) measurements below the decomposition temperature were also performed, and are shown in SI-Figure 8. For compound **2** the DSC trace shows that melting occurs at ca 190 °C (peak temperature,  $\Delta H = 35.8\text{kJ mol}^{-1}$ ) in the first heating cycle; recrystallization to the same crystalline form is observed in a second heating cycle (exothermic peak at 108 °C, peak temperature,  $\Delta H = 17.8\text{kJ mol}^{-1}$ ), followed by melting at 190 °C (peak temperature,  $\Delta H = 35.0\text{kJ mol}^{-1}$ ) (see SI-Fig. 8). Compound **3 (Form I)** melts at 157 °C (peak temperature,  $\Delta H = 28.9\text{kJ mol}^{-1}$ ) but a second, small peak is observed at ca. 175 °C. Recrystallization occurs during the cooling process and in a second heating cycle, in which melting is observed at 156 °C (peak temperature,  $\Delta H = 2.5\text{kJ mol}^{-1}$ ). When the same measurement is performed on a sample of **3 (Form II)** melting is now observed at 176 °C (peak temperature,  $\Delta H = 38.9\text{kJ mol}^{-1}$ ), and recrystallization occurs on a second heating cycle to **3**

(**Form I**), which melts at 156 °C (peak temperature,  $\Delta H = 5.1 \text{ kJ mol}^{-1}$ ). The small peak observed at 175 °C in the DSC trace of **Form I** is likely due to traces of **Form II**.

The DSC trace of compound **4** (**Form II**) shows an endothermic peak at 181 °C (peak temperature,  $\Delta H = 35.9 \text{ kJ mol}^{-1}$ ), due to melting. A second heating cycle shows the compound melts at the same temperature, i.e. **Form II** recrystallizes from the melt.

The thermal behavior of **3** (**Form II**) has also been investigated via variable temperature X-ray powder diffraction (see SI-Figure 8).

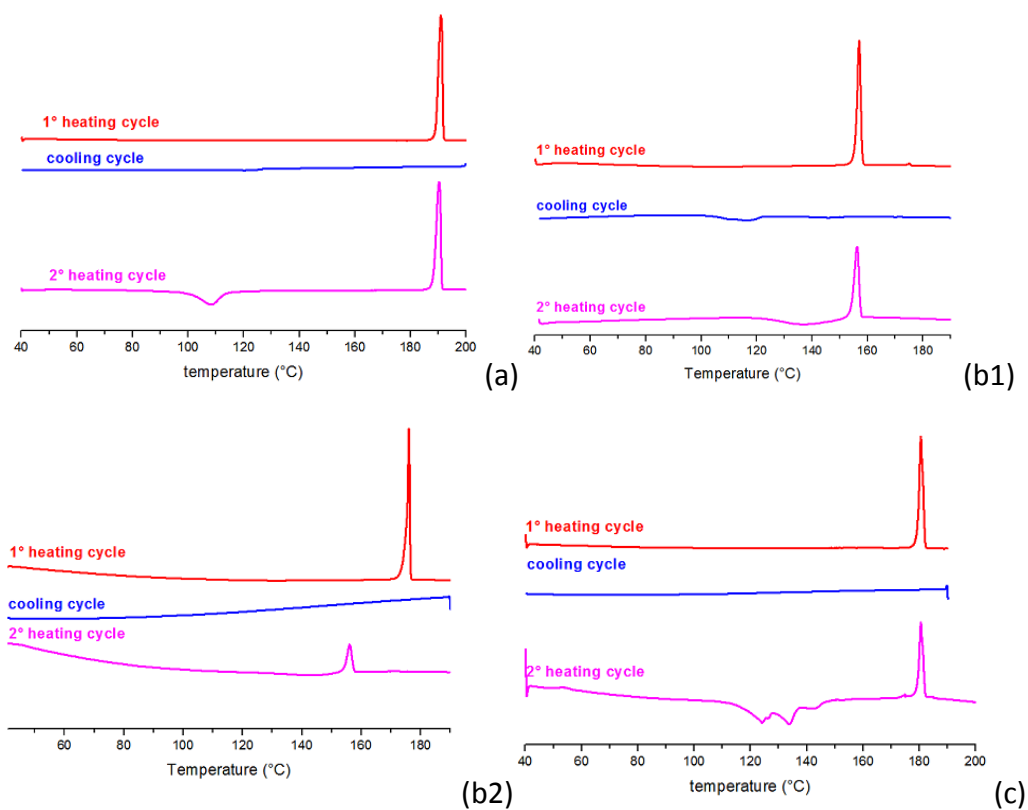

**Figure S8.** DSC traces for the compounds: (a) **2**, (b1) **3** (**Form I**), (b2) **3** (**Form II**), and (c) **4** (**Form II**).



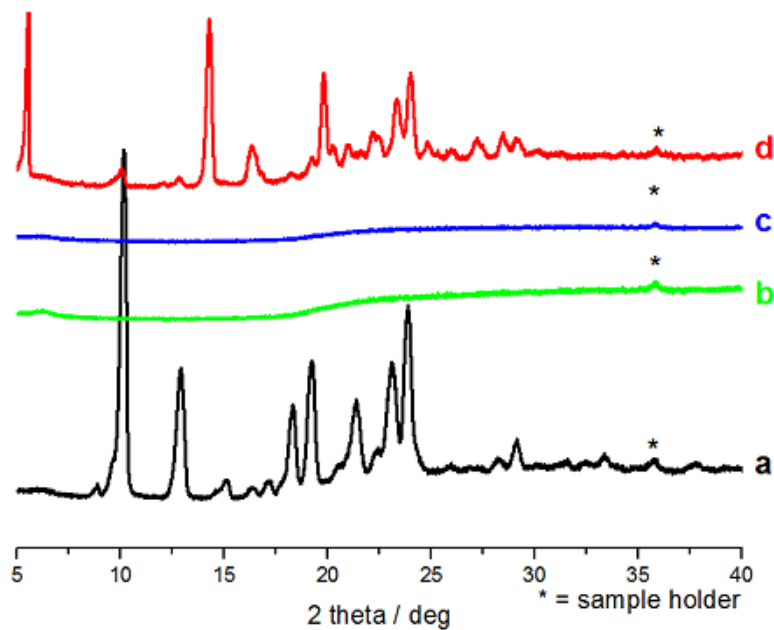

**Figure S9.** VT-XRPD patterns for crystalline **3 (Form II)** at RT (a), at 180 °C (melting occurs) (b) and back at RT (the solid is amorphous); a second heating to 153 °C (d) shows recrystallization to **3 (Form I)**.

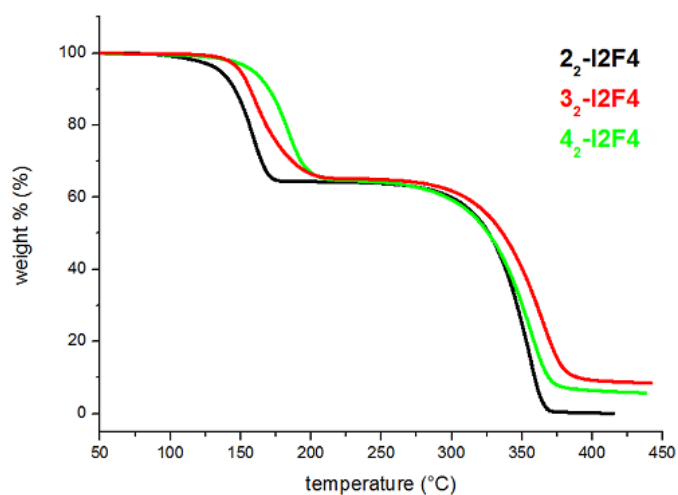

**Figure S10.** TGA thermograms for the co-crystals **2<sub>2</sub>-I2F4**, **3<sub>2</sub>-I2F4**, and **4<sub>2</sub>-I2F4**.

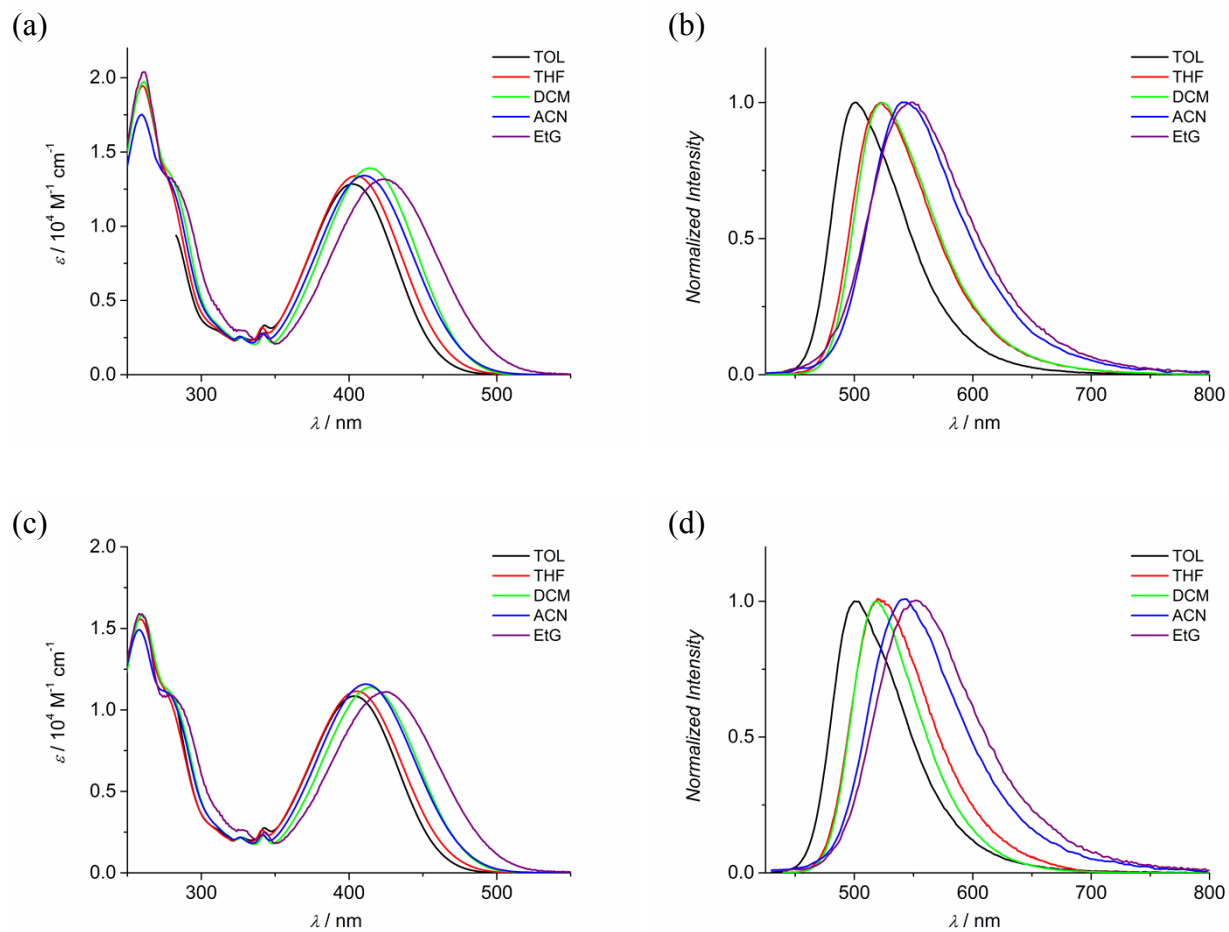

**Figure S11.** Absorption (a, c) and normalized emission (b, d) spectra of **3** (a, b) and **4** (c, d) in the explored solvents at room temperature.

**Table S2.** Luminescence data in toluene glassy matrix at 77 K.

|          | $\lambda_{fl}^{max} / \text{nm}^a$ | $\tau / \text{ns}^b$ | $E / \text{eV}$ |
|----------|------------------------------------|----------------------|-----------------|
| <b>2</b> | 491                                | 7.0                  | 2.53            |
| <b>3</b> | 493                                | 7.2                  | 2.51            |
| <b>4</b> | 493                                | 7.1                  | 2.51            |

<sup>a</sup> From corrected spectra. <sup>b</sup>Fluorescence lifetimes, excitation at 373 nm.

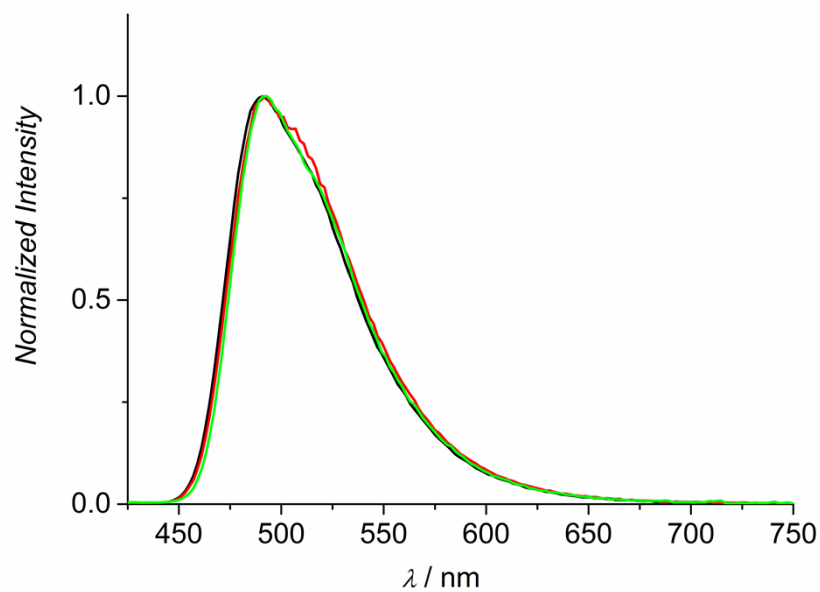

**Figure S12.** Normalized fluorescence spectra of **2** (black), **3** (red) and **4** (green) in toluene at 77K. Excitation at 400 nm.

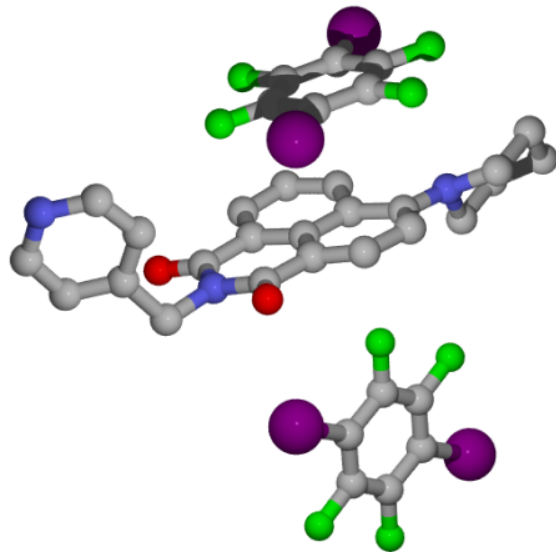

**Figure S13.** Structural detail that highlights how the halogenated co-formers lie above and below the naphthalimide units in crystalline **4<sub>2</sub>·I2F4**. H<sub>CH</sub> omitted for clarity.
